# Supplementary material for: NAD+ supplementation rejuvenates aged gut adult stem cells
Source: PubMed Central journal article supplement (PMC6516145; doi:10.1111/acel.12935), 2019-03-27

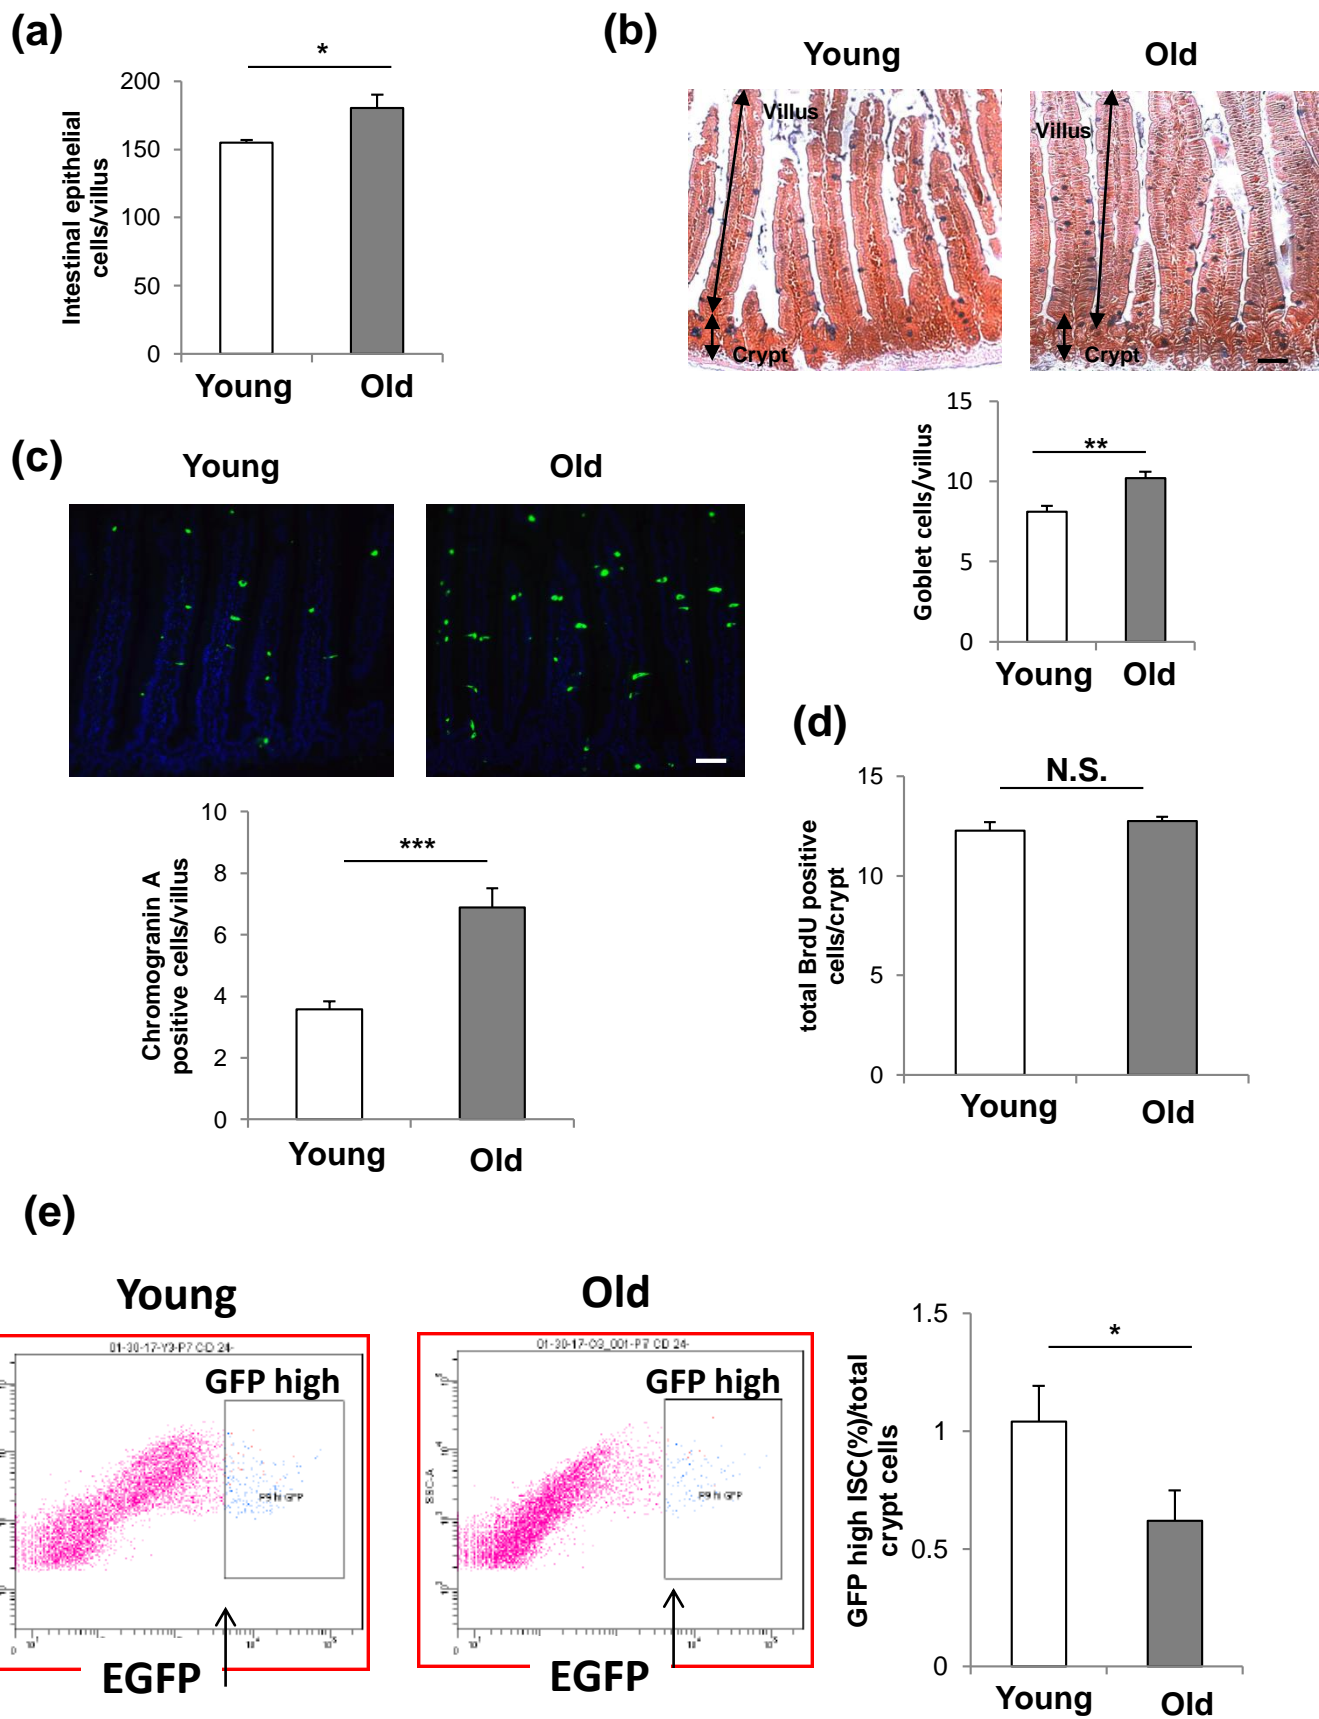

(a)

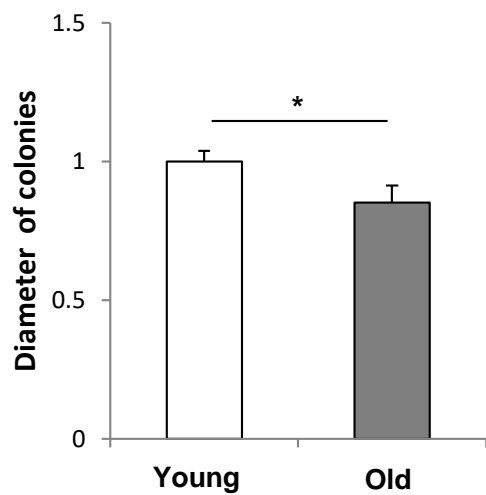

(b)

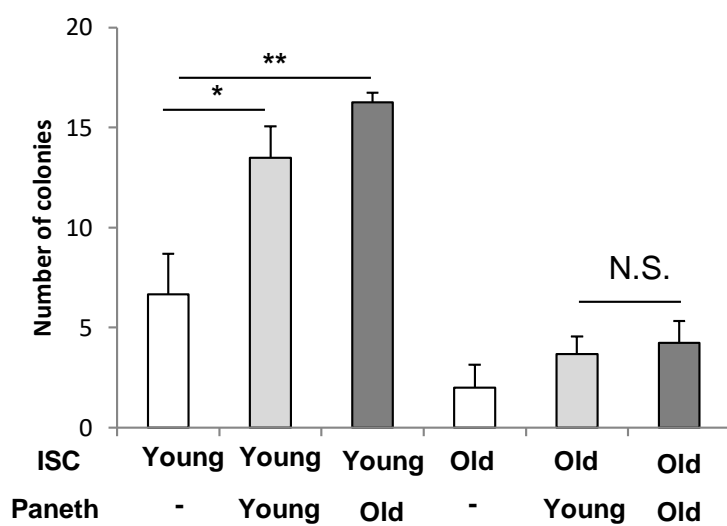

(c)

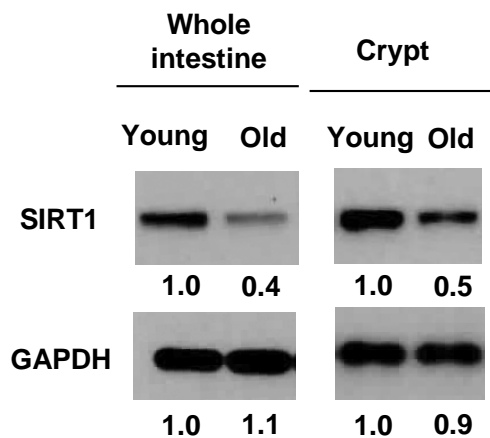

(d)

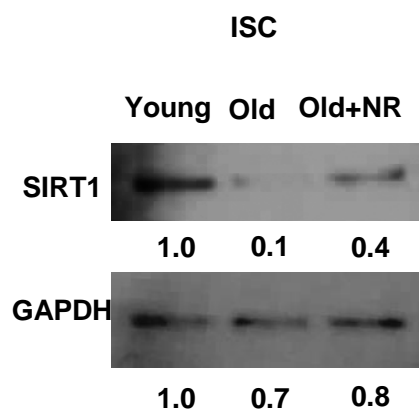

(a)

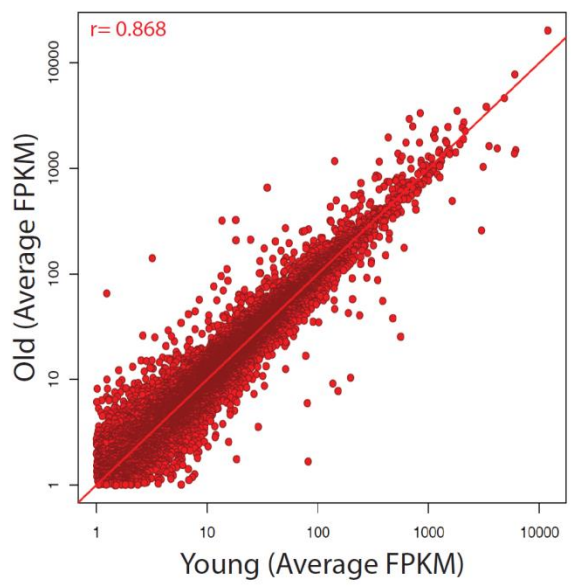

(b)

| Gene ID                | Young (Average FPKM) | Old (Average FPKM) | log2(fold_change) | q_value    | Gene ID          | Young (Average FPKM) | Old (Average FPKM) | log2(fold_change) | q_value    |
|------------------------|----------------------|--------------------|-------------------|------------|------------------|----------------------|--------------------|-------------------|------------|
| Reg3b                  | 670.052              | 2943.42            | 2.13515           | 0.00910147 | Hsph1            | 139.538              | 56.1016            | -1.31454          | 0.0460339  |
| Apoa1                  | 715.457              | 2490.49            | 1.79949           | 0.00910147 | Lgals3           | 23.8038              | 55.0113            | 1.20854           | 0.0350321  |
| Mir5121,Rpl13a,Snord33 | 1146.72              | 2321.22            | 1.01736           | 0.0350321  | Ggt1             | 20.1541              | 53.2701            | 1.40225           | 0.00910147 |
| Apoa4                  | 620.431              | 1768.78            | 1.51141           | 0.0430539  | Cyp2b10          | 15.9021              | 48.4649            | 1.60772           | 0.00910147 |
| Fabp1                  | 826.531              | 1768.72            | 1.09757           | 0.00910147 | Cyp3a13          | 19.4557              | 47.2981            | 1.28159           | 0.00910147 |
| Rbp2                   | 526.281              | 1377.22            | 1.38786           | 0.00910147 | Hpgd             | 19.875               | 47.2711            | 1.25001           | 0.0154725  |
| 2210404O07Rik          | 554.189              | 1187.14            | 1.09904           | 0.0215895  | Cyp2d26          | 18.1035              | 45.3326            | 1.32428           | 0.0315765  |
| 2200002D01Rik          | 336.296              | 855.33             | 1.34675           | 0.00910147 | Mir17hg,Mir19b-1 | 7.76562              | 44.5232            | 2.51939           | 0.0460339  |
| Rabggb,Snord45c        | 34.8038              | 655.257            | 4.23474           | 0.00910147 | Abcc2            | 14.7825              | 41.405             | 1.48591           | 0.00910147 |
| Mt1                    | 242.162              | 580.198            | 1.26057           | 0.00910147 | Nr1d1            | 10.3352              | 40.6452            | 1.97552           | 0.00910147 |
| Guca2b                 | 129.707              | 433.729            | 1.74154           | 0.00910147 | Slc26a3          | 18.0152              | 40.1854            | 1.15746           | 0.0315765  |
| Hipk3,Mir1902          | 13.6118              | 319.294            | 4.55196           | 0.00910147 | Fbp1             | 13.8486              | 40.1738            | 1.53651           | 0.0315765  |
| Sis                    | 72.2196              | 252.402            | 1.80526           | 0.00910147 | Slc25a24         | 15.3096              | 38.3472            | 1.32469           | 0.00910147 |
| Bpnt1                  | 109.886              | 220.255            | 1.00317           | 0.0315765  | Mme              | 18.6712              | 37.3987            | 1.00217           | 0.0393845  |
| Slc9a3r1               | 106.041              | 219.805            | 1.0516            | 0.0315765  | Hsd17b13         | 10.217               | 35.6409            | 1.80256           | 0.0499113  |
| Mt2                    | 24.5766              | 213.1              | 3.11617           | 0.00910147 | Cirbp            | 5.81019              | 34.6005            | 2.57414           | 0.0154725  |
| Coro2a                 | 91.6118              | 206.147            | 1.17007           | 0.00910147 | Slc6a8           | 16.0509              | 34.216             | 1.09202           | 0.0430539  |
| Slc5a1                 | 78.0694              | 186.067            | 1.25299           | 0.0215895  | Abcg8            | 13.2486              | 32.2835            | 1.28496           | 0.0154725  |
| Gstm1                  | 46.2149              | 166.077            | 1.84542           | 0.00910147 | Dgat2            | 11.3642              | 31.911             | 1.48956           | 0.0215895  |
| Apob                   | 51.2973              | 144.219            | 1.49131           | 0.0215895  | Maf              | 14.0848              | 31.7493            | 1.17259           | 0.0350321  |
| Paps2                  | 49.3341              | 133.235            | 1.43332           | 0.00910147 | Fmo5             | 15.0333              | 31.0948            | 1.04851           | 0.0275067  |
| Kcnc3                  | 303.848              | 132.579            | -1.1965           | 0.0275067  | Slc2a2           | 7.74252              | 30.0048            | 1.95432           | 0.00910147 |
| Enpep                  | 49.3548              | 129.981            | 1.39704           | 0.00910147 | Mir3062,Pfas     | 12.7225              | 29.4883            | 1.21277           | 0.0393845  |
| Iftm3                  | 303.254              | 125.733            | -1.27016          | 0.0154725  | Akr1b8           | 4.44455              | 29.4738            | 2.72932           | 0.0315765  |
| Aldh1a1                | 53.1201              | 120.043            | 1.17622           | 0.00910147 | Slc15a1          | 8.97078              | 27.1441            | 1.59733           | 0.00910147 |
| Acadl                  | 60.4367              | 119.126            | 0.978994          | 0.0215895  | Myc              | 60.2757              | 25.8612            | -1.22079          | 0.00910147 |
| Sepp1                  | 39.6199              | 114.424            | 1.5301            | 0.00910147 | lyd              | 3.36181              | 25.1313            | 2.90218           | 0.0154725  |
| Ces1f                  | 50.0747              | 106.207            | 1.08473           | 0.0350321  | Sec24d           | 10.8971              | 24.7369            | 1.18273           | 0.0350321  |
| Gpd1                   | 49.1049              | 102.752            | 1.06523           | 0.0154725  | Cyp27a1          | 6.87583              | 23.9324            | 1.79936           | 0.0430539  |
| Creb3l3                | 30.3965              | 102.534            | 1.75413           | 0.00910147 | Slc6a19          | 5.07631              | 23.0961            | 2.1858            | 0.00910147 |
| Ace                    | 29.6539              | 102.433            | 1.78839           | 0.00910147 | Prelp            | 52.0403              | 22.0911            | -1.23616          | 0.0460339  |
| Slc6a6                 | 40.6761              | 101.389            | 1.31765           | 0.00910147 | Sifn9            | 50.3459              | 20.8801            | -1.26974          | 0.00910147 |
| Ctca3                  | 275.156              | 92.0953            | -1.57905          | 0.00910147 | Clec2e           | 6.5875               | 20.6252            | 1.64661           | 0.0315765  |
| Mia2                   | 40.8711              | 91.7703            | 1.16695           | 0.00910147 | C530008M17Rik    | 7.12146              | 17.7403            | 1.31679           | 0.00910147 |
| Ms4a10                 | 34.8073              | 91.4897            | 1.39422           | 0.0154725  | Mical2           | 8.19329              | 17.0683            | 1.0588            | 0.0460339  |
| Akr1b7                 | 15.3488              | 86.3315            | 2.49176           | 0.00910147 | Per1             | 5.54937              | 16.4541            | 1.56805           | 0.00910147 |
| Cyp4v3                 | 33.814               | 84.8475            | 1.32725           | 0.00910147 | Sowaha           | 6.11869              | 15.9557            | 1.38277           | 0.0499113  |
| Akr1c19                | 32.7456              | 83.3349            | 1.34762           | 0.00910147 | Slc2a5           | 4.6139               | 15.7766            | 1.77372           | 0.0315765  |
| Por                    | 39.1708              | 81.4973            | 1.05697           | 0.0350321  | Kif21b           | 6.27432              | 15.7488            | 1.32771           | 0.00910147 |
| Zfp36                  | 36.0281              | 80.6137            | 1.1619            | 0.00910147 | Tef              | 2.5276               | 15.1986            | 2.5881            | 0.00910147 |
| Slc7a8                 | 39.5007              | 77.4992            | 0.972303          | 0.0430539  | Sgk1             | 2.81979              | 15.0906            | 2.41999           | 0.0460339  |
| Ano6                   | 34.0261              | 75.2988            | 1.14599           | 0.0154725  | Mafb             | 3.25584              | 12.7761            | 1.97234           | 0.00910147 |
| Xdh                    | 30.8066              | 72.9073            | 1.24282           | 0.0154725  | Cd44             | 27.7856              | 11.2394            | -1.30578          | 0.0154725  |
| Ace2                   | 29.3893              | 69.9477            | 1.25098           | 0.0154725  | Clca2            | 25.7568              | 10.201             | -1.33623          | 0.0215895  |
| Cyp3a11                | 19.3146              | 63.7501            | 1.72273           | 0.00910147 | Zc3h6            | 2.21017              | 9.23341            | 2.06271           | 0.00910147 |
| Gpt                    | 19.4496              | 63.0328            | 1.69636           | 0.00910147 | Dnaja1,Mir207    | 136.43               | 9.13623            | -3.90042          | 0.00910147 |
| Npc1l1                 | 30.8624              | 62.98              | 1.02904           | 0.0460339  | Cd36             | 1.85075              | 8.24773            | 2.15589           | 0.0393845  |
| Cyp2c65                | 24.5379              | 62.8853            | 1.35771           | 0.00910147 | Mir702,Plod3     | 80.1594              | 5.96569            | -3.74811          | 0.00910147 |
| Cdr2                   | 21.4597              | 62.8084            | 1.54932           | 0.00910147 | Banp             | 11.7527              | 3.60826            | -1.70362          | 0.0275067  |
| Tgfb1                  | 26.9651              | 59.899             | 1.15144           | 0.0350321  | Gsdmc4           | 28.8604              | 3.58221            | -3.01017          | 0.00910147 |
| Vat1                   | 21.8065              | 59.4886            | 1.44785           | 0.00910147 | Adamts15         | 8.21375              | 2.96564            | -1.4697           | 0.0430539  |
| Inpp5b,Mir698          | 20.6095              | 59.1636            | 1.5214            | 0.00910147 | Mir678,Prmt2     | 81.6631              | 1.68033            | -5.60287          | 0.00910147 |
| Cobl                   | 18.9471              | 58.0816            | 1.6161            | 0.00910147 |                  |                      |                    |                   |            |
| Ang4                   | 204.753              | 57.9512            | -1.82097          | 0.00910147 |                  |                      |                    |                   |            |
| Cited2                 | 25.6471              | 57.3092            | 1.15997           | 0.0275067  |                  |                      |                    |                   |            |
| Pck1                   | 8.48364              | 57.0149            | 2.74858           | 0.00910147 |                  |                      |                    |                   |            |
| Fkbp5                  | 12.1961              | 56.6774            | 2.21636           | 0.00910147 |                  |                      |                    |                   |            |
| Axin2                  | 112.343              | 56.2103            | -0.999006         | 0.0499113  |                  |                      |                    |                   |            |

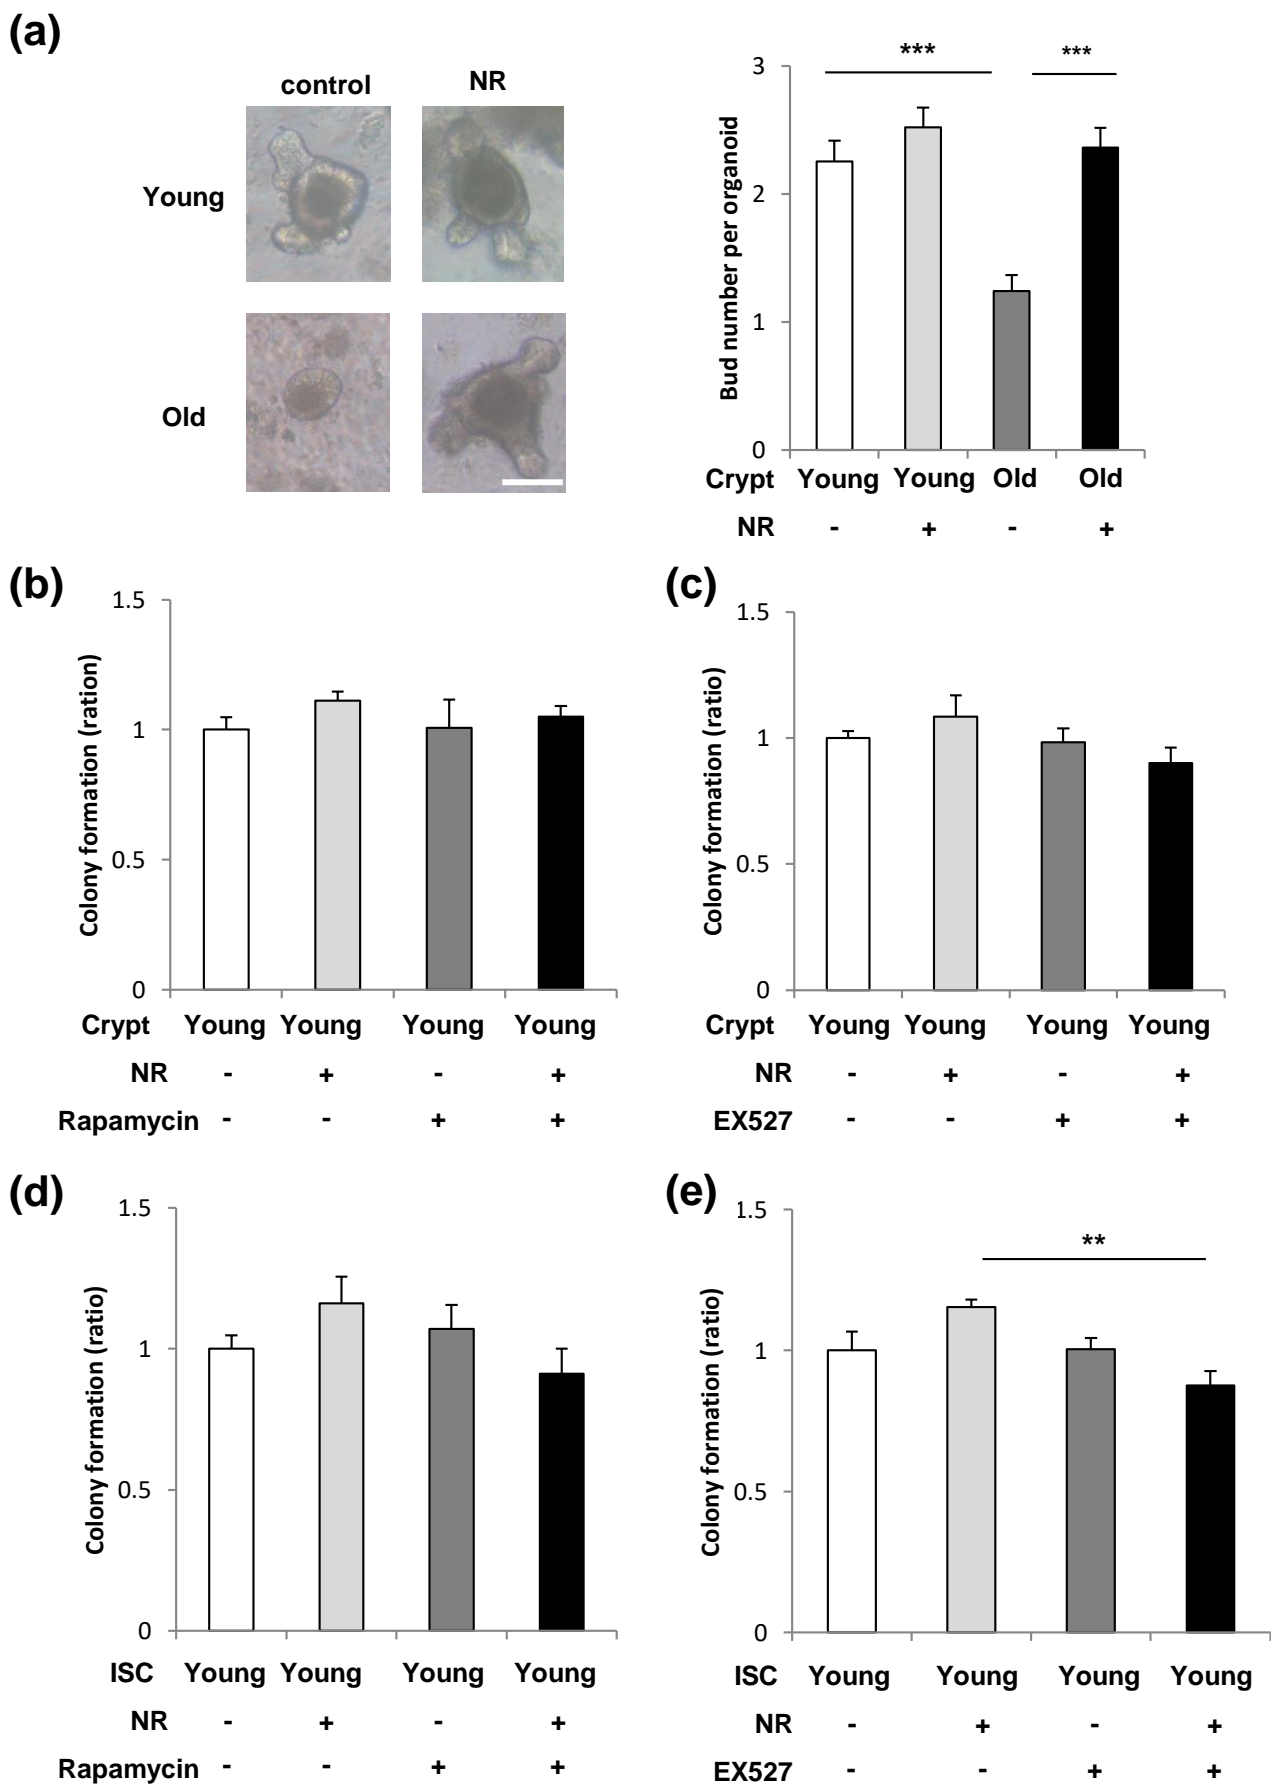

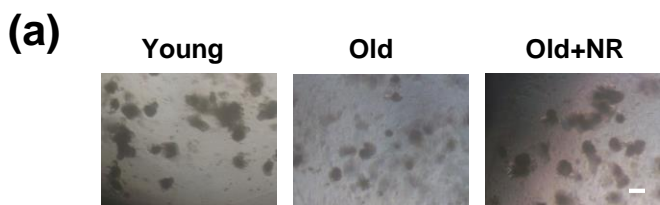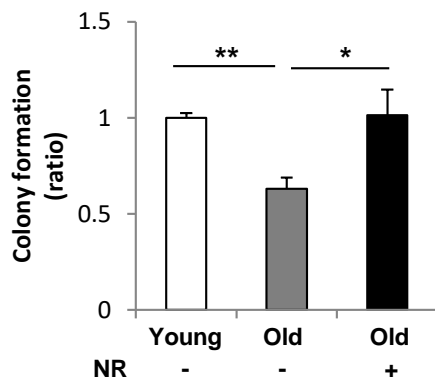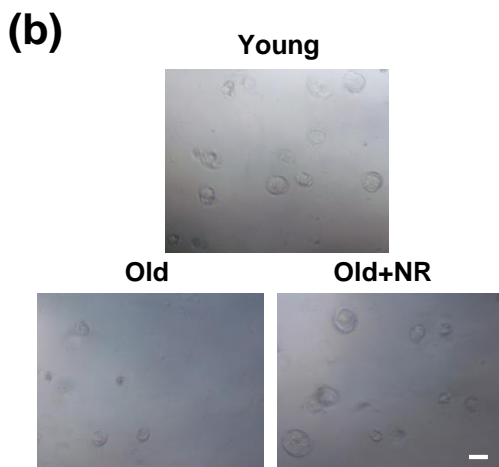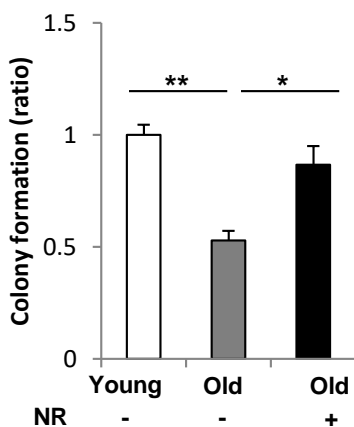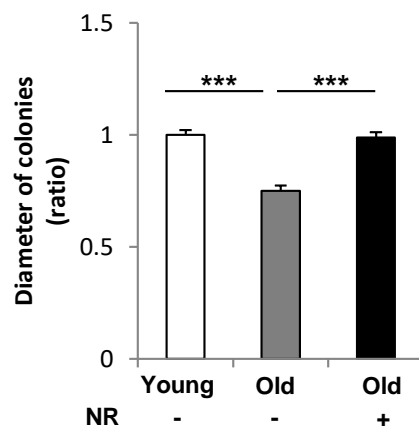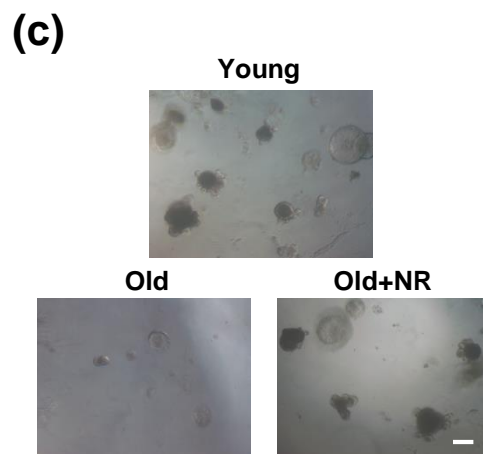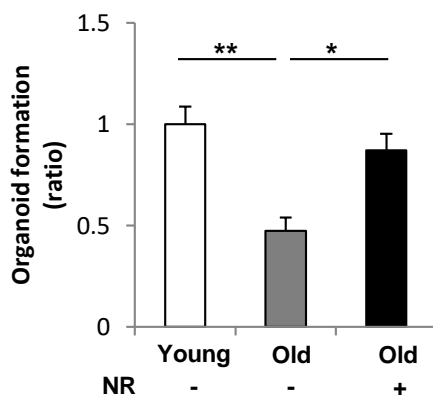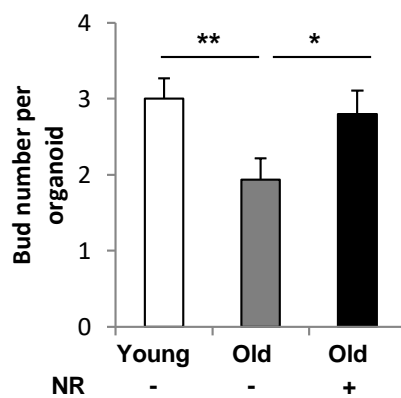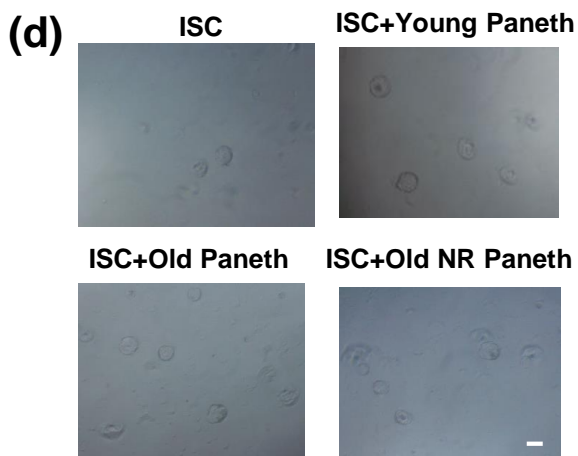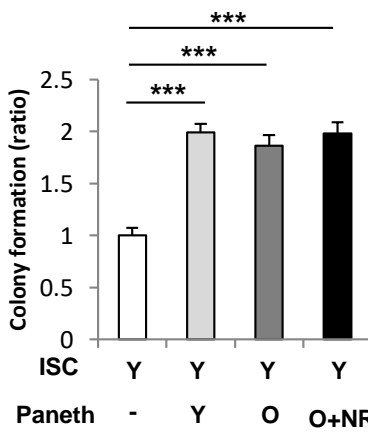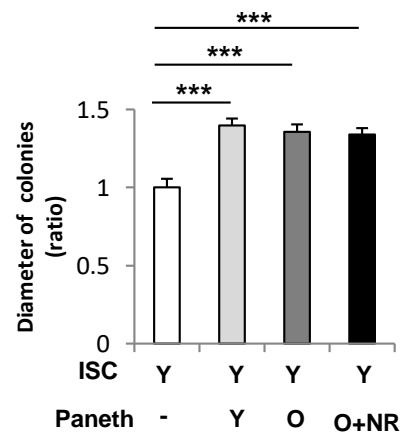

(a)

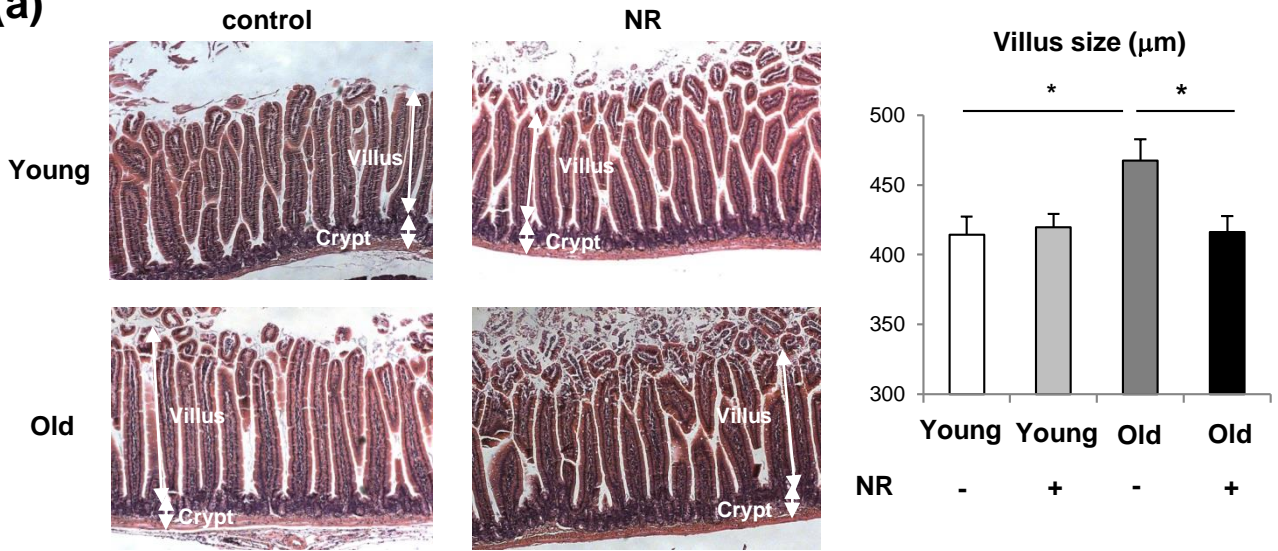

(b)

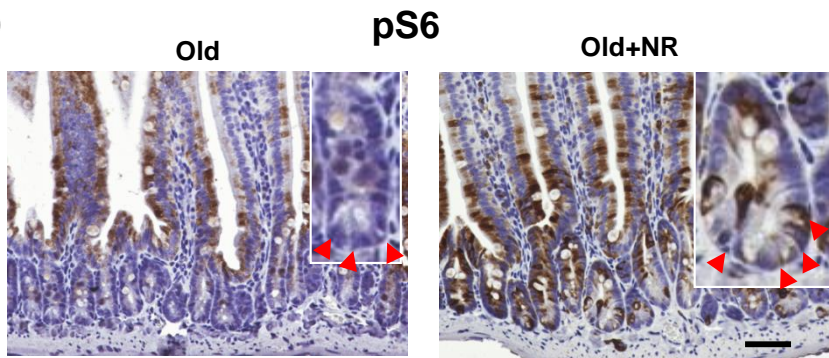

Supplement: ACEL-18-e12935-s001.pdf [file ACEL-18-e12935-s001.pdf]
